# Supplementary material for: Arf6 exacerbates allergic asthma through cell-to-cell transmission of ASC inflammasomes
Source: PubMed Central journal article supplement (PMC8410019; doi:10.1172/jci.insight.139190), 2021-08-23
Supplement: jciinsight-6-139190-s211.pdf [file jciinsight-6-139190-s211.pdf]

1 Supplementary Materials for

2  
3 **Arf6 exacerbates allergic asthma through cell-to-cell transmission of ASC inflammasomes**

4 SangJoon Lee, Akari Ishitsuka, Takahiro Kuroki, Yu-Hsien Lin, Akira Shibuya, Tsunaki Hongu,

5 Yuji Funakoshi, Yasunori Kanaho, Kyosuke Nagata, and Atsushi Kawaguchi\*

6  
7 \*Correspondence to: ats-kawaguchi@md.tsukuba.ac.jp

8  
9 **The PDF file includes:**

10 Supplemental Figure 1. Lung tissue sections of HDM-challenged WT and M $\phi$ -*Arf6* cKO mice.

11 Supplemental Figure 2. OVA uptake by dendritic cells for antigen presentation in mLN.

12 Supplemental Figure 3. The amount of IL-13<sup>+</sup> ILC2 cells in OVA-challenged WT and M $\phi$ -*Arf6* cKO  
13 mice.

14 Supplemental Figure 4. Isolation of airway macrophages from WT and M $\phi$ -*Arf6* cKO mice.

15 Supplemental Figure 5. Purification of extracellular GFP-ASC specks.

16 Supplemental Figure 6. Extracellular ASC specks-mediated IL-1 $\beta$  production in neutrophils.

17 Supplemental Figure 7. Effect of SecinH3 on allergic inflammation in M $\phi$ -*Arf6* cKO mice.

18

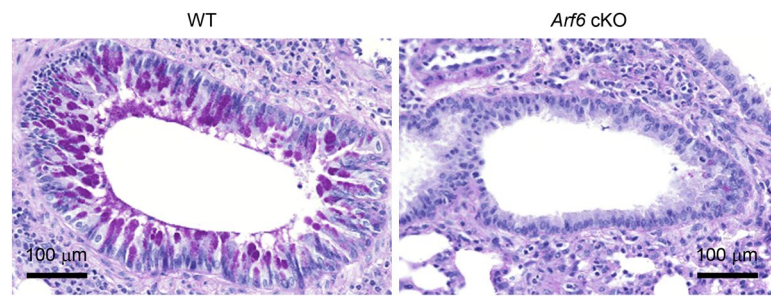

19

20 **Supplemental Figure 1. Lung tissue sections of HDM-challenged WT and M $\phi$ -*Arf6* cKO mice.**

21 Lung tissue sections were stained with PAS-hematoxylin at day 1 after the last HDM challenge. Data

22 are representative of three independent experiments.

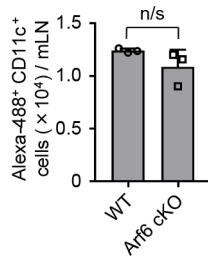

23

24 **Supplemental Figure 2. OVA uptake by dendritic cells for antigen presentation in mLN.**

25 Alexa Fluor 488-conjugated OVA (100  $\mu$ g) was intranasally administered to OVA-sensitized mice at  
26 day 7 after the last immunization. At day 1 after the OVA challenge, the single cell suspensions were  
27 obtained from isolated mediastinal lymph nodes (mLN) and were stained with anti-CD45 and  
28 anti-CD11c antibodies. The total number of Alexa Fluor 488-positive dendritic cells in mLN was  
29 shown (n = 3 mice per group). Each symbol represents one mouse. n/s; not significant.

30

31

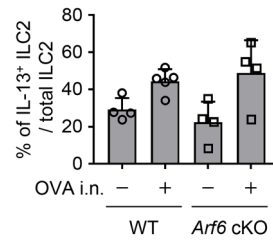

32

33 **Supplemental Figure 3. The amount of IL-13<sup>+</sup> ILC2 cells in OVA-challenged WT and M $\phi$ -*Arf6***  
34 **cKO mice.**

35 Cell suspensions were prepared from lungs of WT and M $\phi$ -*Arf6* cKO mice after OVA challenge.  
36 CD45<sup>+</sup>Lin<sup>-</sup>CD44<sup>+</sup>CD90<sup>+</sup>ST2<sup>+</sup>CD25<sup>+</sup> cells were isolated from the lung cells as ILC2 cells. The  
37 isolated ILC2 cells were incubated with Golgi STOP protein transport inhibitor (BD) at 37°C  
38 for 4 h and subjected to immunostaining with anti-IL-13 antibody after 4% PFA fixation. The  
39 percentages of IL-13<sup>+</sup> ILC2 cells to total ILC2 cells were shown. Each symbol represents one  
40 mouse (n = 4 to 5 mice per group). The combined results from two independent experiments are  
41 shown.

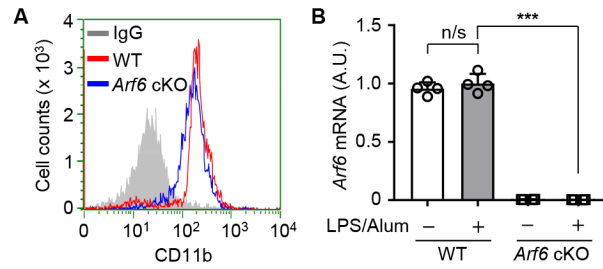

42

43 **Supplemental Figure 4. Isolation of airway macrophages from WT and M $\phi$ -*Arf6* cKO mice.**

44 **(A)** Airway macrophages in BALF obtained from WT and M $\phi$ -*Arf6* cKO mice were isolated and the  
 45 number of CD11b<sup>+</sup> (Mac-1) cells were counted by flow cytometry. Data are representative of three  
 46 independent experiments. **(B)** At 36 h post treatment of 200 ng/ml LPS and 250  $\mu$ g/ml alum, total  
 47 RNAs were purified from WT and *Arf6*<sup>-/-</sup> macrophages and subjected to real-time PCR with primers  
 48 specific for *Arf6* mRNA. Mean  $\pm$  SD from four independent experiments are shown. n/s; not  
 49 significant, \*\*\* $P < 0.001$ ; two-tailed Student's *t*-test.

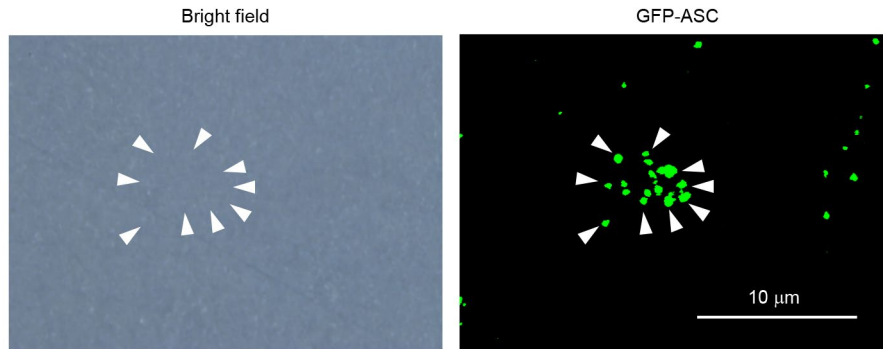

50

51 **Supplemental Figure 5. Purification of extracellular GFP-ASC specks.**

52 At 48 h post treatment of 200 ng/ml LPS and 250  $\mu$ g/ml alum, the supernatants of THP-1  
53 macrophages constitutively expressing GFP-ASC was centrifuged to remove cell debris and then  
54 subjected to a Percoll gradient to purify extracellular GFP-ASC specks. It was confirmed that there  
55 is no contamination of THP-1 cells in the bright field images. Representative images of cell-free  
56 purified extracellular GFP-ASC specks are shown.

57

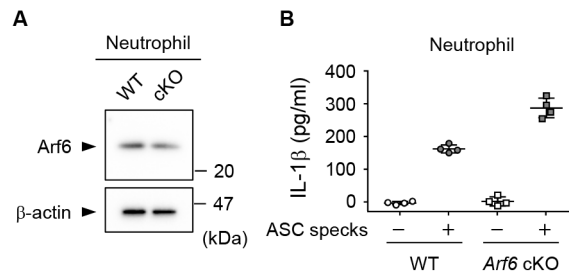

58

59 **Supplemental Figure 6. Extracellular ASC specks-mediated IL-1β production in neutrophils.**

60 Neutrophils were isolated from bone marrow cells by Neutrophil isolation kit (Milteny Biotec;

61 130-097-658) according to the manufacturer's instruction. **(A)** The expression level of Arf6 in

62 neutrophils isolated from WT and Mφ-*Arf6* cKO mice was examined. **(B)** IL-1β production in

63 neutrophils isolated from WT and Mφ-*Arf6* cKO mice was examined by ELISA at 6 h post treatment

64 of  $5 \times 10^4$  particles of purified extracellular ASC specks.

65

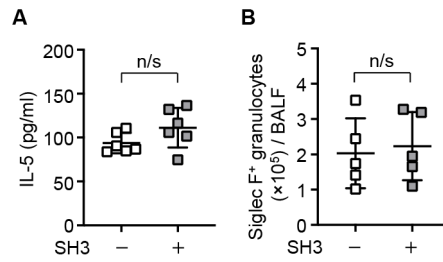

66

67 **Supplemental Figure 7. Effect of SecinH3 on allergic inflammation in M $\phi$ -*Arf6* cKO mice.**

68 OVA-immunized M $\phi$ -*Arf6* cKO mice were intranasally injected with OVA at day 7 after the last

69 immunization. After a 1-day incubation, the mice were intranasally administered with 50 nmol/head

70 SecinH3 (SH3) and then challenged with OVA at days 10 and 13 after the last immunization. The

71 amount of IL-5 (**A**) and the number of Siglec-F<sup>+</sup> granulocytes (**B**) in BALF were examined at day 1

72 after the last OVA challenge by ELISA and FACS, respectively ( $n = 5$  to 6 mice per group). Each

73 symbol represents one mouse. n/s; not significant.
